# Supplementary material
Source: publisher site journal article supplement (https://www.dovepress.com/article/404913)
Supplement: Supplementary file 1 [file get_supplementary_file.php]

Table S1. Exposures and covariates selected in the investigation of the effect of regular exposure to inhaled corticosteroids (ICS) and COVID-19 risk from 1 Jan 2020 to 31 Dec 2020.

| **Sociodemographic factors** | **Codes/definition/Notes** | **Register source** | **Lookback window before index date (1 Jan 2020)** |
| --- | --- | --- | --- |
| Age | As continuous variable, and in 10-year age groups | RTB | 5 years |
| Gender | Men and women | RTB | 5 years |
| Employment status | Created using the LISA variable "employment” and stratified by age where; “employed” were either employed or with entrepreneurial income, and “unemployed” were the unemployed and without entrepreneurial income. This variable was further grouped by age that included: unemployed and unemployed aged 40-64 years; employed 65+ and retired 65+. | LISA | 1 year |
| Education level | Primary, secondary, and higher: Primary education included pre-secondary education shorter than 9 years, equal to 9 years or more than 9 years. Secondary educated included 2-year high school education, secondary education shorter than 3 years or longer than 3 years, and tertiary education included those with post-high-school education | LISA | 1 year |
| **Patient factors** | **Description** |  |  |
| Body mass index (BMI) | This variable was created by grouping the last observed BMI values (in Kg/M2) into four categories according to the WHO BMI classification as “underweight” (BMI < 18.5), “normal” (BMI =18.5 to 24.0), “pre-obesity or overweight” (BMI > 24.0 to 29.9) and “obese” (BMI above 30). Data on BMI was primarily from SNAR and supplemented with data from other registers where similar data was available. | Primarily SNAR | 5 years |
| Smoking | From SNAR; available as a variable in the SNAR register that was not measured for all visits that the patients made to the healthcare facilities, and therefore, the last observed smoking status before index was used for this variable. Never smokers had never been smokers; former smokers quit smoking for at least 6 months; current smokers includes infrequent (non-daily smokers) and frequent smokers (1 to >20 cigarettes daily). Data on smoking was primarily from SNAR and supplemented with data from other registers where similar data was available. | Primarily SNAR | 5 years |
| Spirometry | Post-bronchodilator Forced Expiratory Volume in one second, percent of predicted (FEV1% predicted) values used, if missing, pre-bronchodilator values used; Re-coded as a categorical variable (80+, 50-79, 30-49, <30). | Primarily SNAR | 5 years |
| COPD diagnosis | International Classification of Diseases, revision 10 (ICD-10) diagnostic codes J41–J44 related to specialist care visits or hospital admissions in the National Patient Register (NPR) or being registered as COPD patients in the Swedish National Airway Register (SNAR), from 1 Jan 2015 until 31 Dec 2019. | SNAR and NPR | 5 years |
| **Comorbidities** | **(ICD-10 codes)** |  |  |
| Hypertension | I10-I15 | NPR | 5 years |
| Cardiovascular disease | I00-I99 | NPR | 5 years |
| Heart failure | I50 | NPR | 5 years |
| Ischemic heart disease | I20 I21 I22 I23 I24 I25 Z951 Z955 | NPR | 5 years |
| Stroke | I60 I61 I62 I630-I635 I638-I639 I64 | NPR | 5 years |
| Diabetes | E10 E11 E13 E14 | NPR | 5 years |
| Respiratory disease | J10-J18 | NPR | 5 years |
| COPD | J44 | NPR | 5 years |
| Asthma | J45 | NPR | 5 years |
| Respiratory failure | J96 | NPR | 5 years |
| Lung cancer | C34 | NPR | 5 years |
| Kidney failure | N17 N18 N19 | NPR | 5 years |
| Chronic kidney disease | N18 | NPR | 5 years |
| Rheumatic/Immunological diseases | M05-M09, M13, M15, M30-M36, M45, E24.8, M79.7, L93, L40, I73 | NPR | 5 years |
| **Drug exposures** | **ATC Codes or description** |  |  |
| Main exposure variable | 3 or more prescriptions of ICS in the year preceding index |  |  |
| Prescription of ICS in the past year | One prescription of ICS in the year preceding index (R03BA, R03AK, R03AL08, R03AL09) | NPDR | 1 year |
| ACE inhibitors | C09A, C09B | NPDR | 1 year |
| Oral corticosteroids | Oral forms of ATC codes H02AB01, H02AB02, H02AB04, H02AB07,H02AB09 H02AB10 and H02AB13 | NPDR | 1 year |
| Biologics | R03DX05, R03DX10, R03DX09, R03DX08 | NPDR | 1 year |
| SABA | R03AC02, R03AC03 | NPDR | 1 year |
| LABA | R03AC12, R03AK06, R03AC13, R03AK07, R03AK08, R03AK11, R03AL05, R03AL07, R03AL09, R03AL11, R03AC19, R03AL06, R03AC18, R03AK14, R03AK10 | NPDR | 1 year |
| SAMA | R03BB01, R03AL02 | NPDR | 1 year |
| LAMA | R03BB04, R03AL06, R03BB05, R03AL05, R03BB06, R03AL12, R03AL11, R03AL09, R03AL07, R03AL04, R03BB07, R03AL03, R03AL08 | NPDR | 1 year |
| LTRA | R03DC03 | NPDR | 1 year |
| Immunosuppressant | L04AA04, L04AA06, L04AA10, L04AA13, L04AA18, L04AA23, L04AA24, L04AA25, L04AA26, L04AA27, L04AA28, L04AA29, L04AA31, L04AA32, L04AA33,L04AA34,L04AA36,L04AA37,L04AA38,L04AA40,L04AA41, L04AA42,L04AA43,L04AA44,L04AA45 | NPDR | 1 year |
| Statins | C10AA, C10AA01, C10AA02, C10AA03, C10AA04, C10AA05, C10AA07, C10AB, C10AX09 | NPDR | 1 year |

RTB, register of total populations; LISA, longitudinal integrated database for health insurance and labor market studies; NPR, National Patient Register; NPDR, National Prescribed Drug Register; SNAR, Swedish national airways register; BMI, body mass index; FEV1, Forced Expiratory Volume in 1st second; CAT, COPD Assessment Test; IHD, ischemic heart disease; ICD, international classification of diseases; ATC, anatomical therapeutic classification; mMRC, modified Medical Research Council dyspnea scale; ACE, angiotensin converting enzyme inhibitors; ARB, angiotensin receptor blockers; TNF, tumor necrosis factor; ICS, inhaled corticosteroids; OCS, oral corticosteroids; SABA, short-acting bronchodilator agonists; LABA, long-acting bronchodilator agonists; SAMA, short-acting muscarinic antagonists; LAMA, long-acting muscarinic antagonists; LTRA, leukotriene receptor antagonists; PDE-4, phosphodiesterase-4 inhibitors; GOLD, Global initiative of chronic obstructive pulmonary disease; WHO, world health organization

Table S2. Demographic characteristics, comorbidities, and prescribed medications of the **COVID-19 diagnosed sub-cohorts** of the whole population and COPD patient subpopulation on 1 Jan 2020, for individuals 40 years of age exposed and non-exposed to prior regular treatment with inhaled corticosteroids (ICS), with standardized mean differences (SMD) to assess differences for all characteristics between the cohorts before (crude) and after ATT weighting by propensity scores (weighted)

|  | General population (N = 233668) | | | | COPD patients (N = 6662) | | | |
| --- | --- | --- | --- | --- | --- | --- | --- | --- |
|  | Non-exposed* | Exposed ** |  |  | Non-exposed* | Exposed ** |  |  |
| n (%) | 224001 (95.9%) | 9667 (4.1%) | SMD  (crude) | SMD  (Weighted) | 3961 (59.5%) | 2701 (40.5%) | SMD  (crude) | SMD  (Weighted) |
| **Demographics** |  |  |  |  |  |  |  |  |
| Age (mean ± SD) | 58.0 (13.8) | 64.9 (14.6) |  |  | 74.7 (11.2) | 75.1 (10.6) |  |  |
| Age categories (years) |  |  | 0.511 | 0.016 |  |  | 0.088 | 0.025 |
| 40-49 | 72749 (32.5%) | 1641 (17.0%) |  |  | 71 (1.8%) | 33 (1.2%) |  |  |
| 50-59 | 69770 (31.1%) | 2345 (24.3%) |  |  | 333 (8.4%) | 204 (7.6%) |  |  |
| 60-69 | 37630 (16.8%) | 1985 (20.5%) |  |  | 805 (20.3%) | 508 (18.8%) |  |  |
| 70-79 | 20417 (9.1%) | 1766 (18.3%) |  |  | 1297 (32.7%) | 964 (35.7%) |  |  |
| 80-89 | 16327 (7.3%) | 1468 (15.2%) |  |  | 1144 (28.9%) | 801 (29.7%) |  |  |
| 90+ | 7108 (3.2%) | 462 (4.8%) |  |  | 311 (7.9%) | 191 (7.1%) |  |  |
| Gender = women | 117528 (52.5%) | 5733 (59.3%) | 0.138 | 0.009 | 2022 (51.0%) | 1525 (56.5%) | 0.109 | 0.017 |
| Employment |  |  | 0.484 | 0.015 |  |  | 0.069 | 0.029 |
| Unemployed 40-64 years | 14174 (6.3%) | 696 (7.2%) |  |  | 316 (8.0%) | 185 (6.8%) |  |  |
| Employed 40-64 years | 152652 (68.2%) | 4435 (45.9%) |  |  | 487 (12.3%) | 290 (10.7%) |  |  |
| Employed ≥ 65 years | 12970 (5.8%) | 771 (8.0%) |  |  | 319 (8.1%) | 221 (8.2%) |  |  |
| Retired ≥ 65 years | 44180 (19.7%) | 3765 (38.9%) |  |  | 2839 (71.7%) | 2005 (74.2%) |  |  |
| Education |  |  | 0.209 | 0.015 |  |  | 0.026 | 0.041 |
| Primary | 37692 (17.1%) | 2338 (24.6%) |  |  | 1516 (39.2%) | 1043 (39.5%) |  |  |
| Secondary | 96490 (43.7%) | 4151 (43.7%) |  |  | 1708 (44.2%) | 1184 (44.8%) |  |  |
| Higher | 86841 (39.3%) | 3020 (31.8%) |  |  | 642 (16.6%) | 414 (15.7%) |  |  |
| **Comorbidities** |  |  |  |  |  |  |  |  |
| Hypertension | 32675 (14.6%) | 2912 (30.1%) | 0.380 | 0.003 | 2180 (55.0%) | 1487 (55.1%) | <0.001 | 0.033 |
| Cardiovascular disease | 49642 (22.2%) | 4072 (42.1%) | 0.438 | 0.011 | 2851 (72.0%) | 1947 (72.1%) | 0.002 | 0.008 |
| Heart failure | 7401 (3.3%) | 1044 (10.8%) | 0.296 | 0.007 | 978 (24.7%) | 721 (26.7%) | 0.046 | 0.028 |
| IHD | 11072 (4.9%) | 1072 (11.1%) | 0.228 | 0.002 | 989 (25.0%) | 651 (24.1%) | 0.020 | <0.001 |
| Stroke | 4753 (2.1%) | 329 (3.4%) | 0.078 | 0.012 | 350 (8.8%) | 180 (6.7%) | 0.081 | 0.007 |
| Diabetes | 15123 (6.8%) | 1181 (12.2%) | 0.187 | 0.016 | 941 (23.8%) | 582 (21.5%) | 0.053 | 0.02 |
| Respiratory disease | 13687 (6.1%) | 4864 (50.3%) | 1.128 | 0.008 | 3121 (78.8%) | 2400 (88.9%) | 0.276 | 0.033 |
| COPD *** | 2917 (1.3%) | 2275 (23.5%) | 0.716 | 0.010 | 2917 (73.6%) | 2275 (84.2%) | 0.262 | 0.005 |
| Asthma | 3379 (1.5%) | 2937 (30.4%) | 0.858 | 0.018 | 406 (10.2%) | 735 (27.2%) | 0.445 | 0.037 |
| Respiratory failure | 805 (0.4%) | 392 (4.1%) | 0.254 | 0.027 | 273 (6.9%) | 342 (12.7%) | 0.195 | 0.058 |
| Lung cancer | 474 (0.2%) | 91 (0.9%) | 0.097 | 0.005 | 113 (2.9%) | 71 (2.6%) | 0.014 | 0.001 |
| Rheumatologic or immunological disease | 10295 (4.6%) | 891 (9.2%) | 0.183 | 0.024 | 628 (15.9%) | 386 (14.3%) | 0.044 | 0.013 |
| CKD | 4172 (1.9%) | 377 (3.9%) | 0.122 | 0.009 | 434 (11.0%) | 222 (8.2%) | 0.093 | 0.010 |
| Kidney failure | 5679 (2.5%) | 543 (5.6%) | 0.156 | 0.005 | 602 (15.2%) | 324 (12.0%) | 0.094 | 0.001 |
| **Prescribed medications** |  |  |  |  |  |  |  |  |
| Oral corticosteroids | 14124 (6.3%) | 3157 (32.7%) | 0.706 | 0.014 | 966 (24.4%) | 1234 (45.7%) | 0.458 | 0.022 |
| Biologics | 33 (0.0%) | 21 (0.2%) | 0.060 | 0.025 | 0 (0.0%) | 1 (0.0%) | 0.027 | 0.027 |
| Inhaled SABA | 11268 (5.0%) | 5968 (61.7%) | 1.505 | 0.002 | 1275 (32.2%) | 1750 (64.8%) | 0.690 | 0.012 |
| Inhaled LABA | 6177 (2.8%) | 7341 (75.9%) | 2.261 | 0.012 | 1313 (33.1%) | 2385 (88.3%) | 1.368 | 0.021 |
| Inhaled SAMA | 480 (0.2%) | 624 (6.5%) | 0.353 | 0.001 | 214 (5.4%) | 414 (15.3%) | 0.330 | 0.012 |
| Inhaled LAMA | 2763 (1.2%) | 2630 (27.2%) | 0.801 | 0.007 | 1909 (48.2%) | 1996 (73.9%) | 0.546 | 0.007 |
| LTRA | 903 (0.4%) | 1391 (14.4%) | 0.555 | 0.014 | 66 (1.7%) | 209 (7.7%) | 0.290 | 0.048 |
| Immunosuppressants | 10871 (4.9%) | 2176 (22.5%) | 0.532 | 0.018 | 759 (19.2%) | 928 (34.4%) | 0.348 | 0.040 |
| Statins | 34659 (15.5%) | 2469 (25.5%) | 0.251 | 0.009 | 1644 (41.5%) | 1057 (39.1%) | 0.048 | 0.011 |
| **Other characteristics** |  |  |  |  |  |  |  |  |
| Body mass index |  |  | 0.168 | 0.014 |  |  | 0.057 | 0.068 |
| Underweight | 1293 (0.6%) | 187 (1.9%) |  |  | 195 (4.9%) | 160 (5.9%) |  |  |
| Normal | 7172 (3.2%) | 1098 (11.4%) |  |  | 738 (18.6%) | 529 (19.6%) |  |  |
| Overweight | 12099 (5.4%) | 1408 (14.6%) |  |  | 801 (20.2%) | 536 (19.8%) |  |  |
| Obese | 19143 (8.5%) | 1907 (19.7%) |  |  | 914 (23.1%) | 614 (22.7%) |  |  |
| Missing | 184294 (82.3%) | 5067 (52.4%) |  |  | 1313 (33.1%) | 862 (31.9%) |  |  |
| Smoking |  |  | 0.381 | 0.022 |  |  | 0.175 | 0.019 |
| Current | 7245 (3.2%) | 757 (7.8%) |  |  | 903 (22.8%) | 470 (17.4%) |  |  |
| Former | 8999 (4.0%) | 1597 (16.5%) |  |  | 1196 (30.2%) | 919 (34.0%) |  |  |
| Non-current | 5240 (2.3%) | 209 (2.2%) |  |  | 146 (3.7%) | 84 (3.1%) |  |  |
| Never | 16484 (7.4%) | 1977 (20.5%) |  |  | 493 (12.4%) | 368 (13.6%) |  |  |
| Missing | 186033 (83.1%) | 5127 (53.0%) |  |  | 1223 (30.9%) | 860 (31.8%) |  |  |
| FEV1 % predicted a |  |  |  |  |  |  | 0.454 | 0.178 |
| >=80 | NA | NA |  |  | 90 (2.3%) | 39 (1.4%) |  |  |
| 50-79 | NA | NA |  |  | 258 (6.5%) | 204 (7.6%) |  |  |
| 30-49 | NA | NA |  |  | 100 (2.5%) | 125 (4.6%) |  |  |
| <30 | NA | NA |  |  | 10 (0.3%) | 38 (1.4%) |  |  |
| Missing | NA | NA |  |  | 3503 (88.4%) | 2295 (85.0%) |  |  |

* Non-exposed = received less than 3 prescriptions of ICS in the year before index (1 Jan 2020).

** Exposed = received at least three filled ICS prescriptions within the year before the index (1 Jan 2020).

*** Narrow COPD definition only by ICD-10 code J44.

a = NA in the general population as FEV1 was considered a covariate more relevant for COPD patients

COPD, chronic obstructive pulmonary disease; ICS, inhaled corticosteroids; ATT, average treatment for the treated; IHD, ischemic heart disease; CKD, chronic kidney disease; SABA, short-acting bronchodilator agonists; LABA, long-acting bronchodilator agonists; SAMA, short-acting muscarinic antagonists; LAMA, long-acting muscarinic antagonists; LTRA, leukotriene receptor antagonists; FEV1% predicted, post-bronchodilator Forced Expiratory Volume in one second, percent of predicted; SD, standard deviation.

Table S3. Demographic characteristics, comorbidities, and prescribed medications of the COVID-19 ***hospitalized*** sub-cohorts of the whole population and COPD patient subpopulation on 1 Jan 2020, for individuals 40 years of age exposed and non-exposed to prior regular treatment with inhaled corticosteroids (ICS), with standardized mean differences (SMD) to assess differences for all characteristics between the cohorts before (crude) and after ATT weighting by propensity scores (weighted)

|  | General population (N = 35435) | | | | COPD patients (N = 3302) | | | | |
| --- | --- | --- | --- | --- | --- | --- | --- | --- | --- |
|  | Non-exposed* | Exposed ** |  |  | Non-exposed* | Exposed ** |  |  |
| n (%) | 32418 (91.5) | 3017 (8.5) | SMD  (crude) | SMD  (Weighted) | 1892 (57.3) | 1410 (42.7) | SMD  (crude) | SMD  (Weighted) |
| **Demographics** |  |  |  |  |  |  |  |  |
| Age (mean ± SD) | 69.3 (14.5) | 71.9 (12.8) |  |  | 76.7 (9.5) | 76.5 (9.2) |  |  |
| Age categories (years) |  |  | 0.271 | 0.037 |  |  | 0.078 | 0.057 |
| 40-49 | 3566 (11.0%) | 190 (6.3%) |  |  | 14 (0.7%) | 10 (0.7%) |  |  |
| 50-59 | 5703 (17.6%) | 384 (12.7%) |  |  | 71 (3.8%) | 56 (4.0%) |  |  |
| 60-69 | 6166 (19.0%) | 556 (18.4%) |  |  | 313 (16.5%) | 216 (15.3%) |  |  |
| 70-79 | 7595 (23.4%) | 948 (31.4%) |  |  | 706 (37.3%) | 576 (40.9%) |  |  |
| 80-89 | 7057 (21.8%) | 760 (25.2%) |  |  | 654 (34.6%) | 463 (32.8%) |  |  |
| 90+ | 2331 (7.2%) | 179 (5.9%) |  |  | 134 (7.1%) | 89 (6.3%) |  |  |
| Gender = women | 13537 (41.8%) | 1620 (53.7%) | 0.241 | 0.018 | 877 (46.4%) | 737 (52.3%) | 0.119 | 0.009 |
| Employment |  |  | 0.228 | 0.020 |  |  | 0.013 | 0.028 |
| Unemployed 40-64 years | 3059 (9.4%) | 255 (8.5%) |  |  | 126 (6.7%) | 94 (6.7%) |  |  |
| Employed 40-64 years | 9342 (28.8%) | 604 (20.0%) |  |  | 92 (4.9%) | 66 (4.7%) |  |  |
| Employed ≥ 65 years | 3071 (9.5%) | 271 (9.0%) |  |  | 144 (7.6%) | 111 (7.9%) |  |  |
| Retired ≥ 65 years | 16940 (52.3%) | 1887 (62.5%) |  |  | 1530 (80.9%) | 1139 (80.8%) |  |  |
| Education |  |  | 0.109 | 0.029 |  |  | 0.017 | 0.050 |
| Primary | 10173 (32.4%) | 1023 (34.7%) |  |  | 742 (40.3%) | 565 (41.0%) |  |  |
| Secondary | 13029 (41.6%) | 1293 (43.9%) |  |  | 819 (44.5%) | 611 (44.3%) |  |  |
| Higher | 8152 (26.0%) | 630 (21.4%) |  |  | 279 (15.2%) | 202 (14.7%) |  |  |
| **Comorbidities** |  |  |  |  |  |  |  |  |
| Hypertension | 11734 (36.2%) | 1434 (47.5%) | 0.231 | 0.004 | 1202 (63.5%) | 858 (60.9%) | 0.055 | 0.020 |
| Cardiovascular disease | 15746 (48.6%) | 1873 (62.1%) | 0.274 | <0.001 | 1526 (80.7%) | 1101 (78.1%) | 0.064 | 0.023 |
| Heart failure | 3588 (11.1%) | 597 (19.8%) | 0.243 | 0.014 | 603 (31.9%) | 437 (31.0%) | 0.019 | 0.010 |
| IHD | 4511 (13.9%) | 581 (19.3%) | 0.144 | 0.010 | 580 (30.7%) | 391 (27.7%) | 0.064 | 0.045 |
| Stroke | 1774 (5.5%) | 159 (5.3%) | 0.009 | 0.007 | 175 (9.2%) | 95 (6.7%) | 0.093 | 0.003 |
| Diabetes | 6126 (18.9%) | 647 (21.4%) | 0.064 | 0.001 | 547 (28.9%) | 354 (25.1%) | 0.086 | 0.028 |
| **Respiratory disease** | 5301 (16.4%) | 2093 (69.4%) | 1.269 | 0.028 | 1609 (85.0%) | 1306 (92.6%) | 0.242 | 0.023 |
| COPD *** | 1502 (4.6%) | 1252 (41.5%) | 0.973 | 0.033 | 1502 (79.4%) | 1252 (88.8%) | 0.259 | 0.017 |
| Asthma | 946 (2.9%) | 1056 (35.0%) | 0.897 | 0.033 | 203 (10.7%) | 376 (26.7%) | 0.418 | 0.073 |
| Respiratory failure | 428 (1.3%) | 251 (8.3%) | 0.331 | 0.047 | 176 (9.3%) | 221 (15.7%) | 0.194 | 0.083 |
| Lung cancer | 221 (0.7%) | 53 (1.8%) | 0.098 | <0.001 | 58 (3.1%) | 43 (3.0%) | 0.001 | 0.002 |
| Rheumatologic or immunological disease | 2958 (9.1%) | 424 (14.1%) | 0.154 | 0.030 | 345 (18.2%) | 240 (17.0%) | 0.032 | 0.038 |
| CKD | 2268 (7.0%) | 230 (7.6%) | 0.024 | 0.003 | 284 (15.0%) | 144 (10.2%) | 0.145 | 0.015 |
| Kidney failure | 2983 (9.2%) | 324 (10.7%) | 0.051 | 0.008 | 375 (19.8%) | 205 (14.5%) | 0.140 | 0.014 |
| Prescribed medications |  |  |  |  |  |  |  |  |
| Oral corticosteroids | 4006 (12.4%) | 1213 (40.2%) | 0.667 | 0.039 | 536 (28.3%) | 677 (48.0%) | 0.414 | 0.048 |
| Biologics | 3 (0.0%) | 3 (0.1%) | 0.039 | 0.044 | 0 (0.0%) | 1 (0.1%) | 0.038 | 0.038 |
| Inhaled SABA | 2247 (6.9%) | 1888 (62.6%) | 1.440 | 0.006 | 594 (31.4%) | 917 (65.0%) | 0.715 | 0.020 |
| Inhaled LABA | 1679 (5.2%) | 2459 (81.5%) | 2.415 | 0.013 | 655 (34.6%) | 1265 (89.7%) | 1.380 | 0.036 |
| Inhaled SAMA | 200 (0.6%) | 320 (10.6%) | 0.445 | 0.028 | 114 (6.0%) | 241 (17.1%) | 0.351 | 0.010 |
| Inhaled LAMA | 1281 (4.0%) | 1335 (44.2%) | 1.068 | 0.014 | 972 (51.4%) | 1103 (78.2%) | 0.586 | 0.025 |
| LTRA | 191 (0.6%) | 375 (12.4%) | 0.494 | 0.033 | 29 (1.5%) | 99 (7.0%) | 0.274 | 0.120 |
| Immunosuppressants | 3414 (10.5%) | 898 (29.8%) | 0.494 | 0.043 | 418 (22.1%) | 515 (36.5%) | 0.321 | 0.032 |
| Statins | 10706 (33.0%) | 1102 (36.5%) | 0.074 | 0.005 | 890 (47.0%) | 589 (41.8%) | 0.106 | 0.016 |
| **Other characteristics** |  |  |  |  |  |  |  |  |
| Body mass index |  |  | 0.148 | 0.041 |  |  | 0.050 | 0.063 |
| Underweight | 541 (1.7%) | 102 (3.4%) |  |  | 106 (5.6%) | 89 (6.3%) |  |  |
| Normal | 2021 (6.2%) | 401 (13.3%) |  |  | 373 (19.7%) | 279 (19.8%) |  |  |
| Overweight | 3621 (11.2%) | 498 (16.5%) |  |  | 373 (19.7%) | 262 (18.6%) |  |  |
| Obese | 5391 (16.6%) | 764 (25.3%) |  |  | 481 (25.4%) | 341 (24.2%) |  |  |
| Missing | 20844 (64.3%) | 1252 (41.5%) |  |  | 559 (29.5%) | 439 (31.1%) |  |  |
| Smoking |  |  | 0.334 | 0.022 |  |  | 0.136 | 0.024 |
| Current | 1580 (4.9%) | 293 (9.7%) |  |  | 406 (21.5%) | 236 (16.7%) |  |  |
| Former | 3410 (10.5%) | 723 (24.0%) |  |  | 636 (33.6%) | 508 (36.0%) |  |  |
| Non-current | 1117 (3.4%) | 75 (2.5%) |  |  | 65 (3.4%) | 41 (2.9%) |  |  |
| Never | 5089 (15.7%) | 619 (20.5%) |  |  | 244 (12.9%) | 176 (12.5%) |  |  |
| Missing | 21222 (65.5%) | 1307 (43.3%) |  |  | 541 (28.6%) | 449 (31.8%) |  |  |
| FEV1 % predicted a |  |  |  |  |  |  | 0.531 | 0.092 |
| >=80 | NA | NA |  |  | 43 (2.3%) | 14 (1.0%) |  |  |
| 50-79 | NA | NA |  |  | 108 (5.7%) | 100 (7.1%) |  |  |
| 30-49 | NA | NA |  |  | 53 (2.8%) | 66 (4.7%) |  |  |
| <30 | NA | NA |  |  | 5 (0.3%) | 22 (1.6%) |  |  |
| Missing | NA | NA |  |  | 1683 (89.0%) | 1208 (85.7%) |  |  |

* Non-exposed = received less than 3 prescriptions of ICS in the year before index (1 Jan 2020).

** Exposed = received at least three filled ICS prescriptions within the year before the index (1 Jan 2020).

*** Narrow COPD definition only by ICD-10 code J44.

a = NA in the general population as FEV1 was considered a covariate more relevant for COPD patients

COPD, chronic obstructive pulmonary disease; ICS, inhaled corticosteroids; ATT, average treatment for the treated; IHD, ischemic heart disease; CKD, chronic kidney disease; SABA, short-acting bronchodilator agonists; LABA, long-acting bronchodilator agonists; SAMA, short-acting muscarinic antagonists; LAMA, long-acting muscarinic antagonists; LTRA, leukotriene receptor antagonists; FEV1% predicted, post-bronchodilator Forced Expiratory Volume in one second, percent of predicted; SD, standard deviation.

Table S4. Events, person time and incidence rates for COVID-19 outcomes per 1000 person years (with 95% Poisson confidence intervals (CI)) for individuals 40 years of age regularly exposed* and non-exposed** to inhaled corticosteroid therapy (ICS) in the whole population and COPD patient subpopulation in the overall cohorts.

|  | General population | | | | | | COPD patients | | | | | | |
| --- | --- | --- | --- | --- | --- | --- | --- | --- | --- | --- | --- | --- | --- |
|  | Total exposed N = 186577 | | | Total non-exposed N = 5056902 | | | Total exposed N = 47559 | | | Total non-exposed N = 85813 | | | |
| COVID-19 outcomes | N | Person years | Incidence rates [95% CI] | N | Person years | Incidence rates [95% CI] | N | Person years | Incidence rates [95% CI] | N | Person years | Incidence rates [95% CI] |
|
| Onset | 9667 | 180500 | 53.6[52.5-54.6] | 224001 | 4959127 | 45.2[45.0-45.4] | 2701 | 44564 | 60.6[58.3-62.9] | 3961 | 81224 | 48.8[47.3-50.3] |
| Hospitalization | 3017 | 181796 | 16.6[16.0-17.2] | 32418 | 4992692 | 6.5[6.4-6.6] | 1410 | 44866 | 31.4[29.8-33.1] | 1892 | 81690 | 23.2[22.1-24.2] |
| ICU admission | 295 | 182610 | 1.6[1.4-1.8] | 3547 | 5001617 | 0.7[0.7-0.7] | 85 | 45234 | 1.9[1.5-2.3] | 126 | 82176 | 1.5[1.3-1.8] |
| Death | 901 | 182692 | 4.9[4.6-5.3] | 9554 | 5002819 | 1.9[1.9-1.9] | 504 | 45252 | 11.1[10.2-12.2] | 732 | 82208 | 8.9[8.3-9.6] |

* Exposed = received at least three filled ICS prescriptions (each generally for 90-100 days use) within the year before the index (1 Jan 2020).

** Non-exposed = received less than 3 prescriptions of ICS in the year before index (1 Jan 2020).

COVID-19, Coronavirus disease, 2019; COPD, chronic obstructive pulmonary disease
